# Supplementary material for: Immune cell census in murine atherosclerosis: cytometry by time of flight illuminates vascular myeloid cell diversity
Source: PubMed Central journal article supplement (PMC6054192; doi:10.1093/cvr/cvy109), 2018-05-02
Supplement: cvy109_cole_et_al_cvr-2018-299_supplementary.pdf [file cvy109_cole_et_al_cvr-2018-299_supplementary.pdf]

**Supplemental Material**

**Immune cell census in murine atherosclerosis: cytometry by time of flight illuminates vascular myeloid cell diversity**

Jennifer E Cole<sup>1\*</sup>, Inhye Park<sup>1\*</sup>, David Ahern<sup>1</sup>, Christina Kassiteridi<sup>1</sup>, Dina Danso Abeam<sup>1</sup>, Michael Goddard<sup>1</sup>, Patricia Green<sup>1</sup>, Pasquale Maffia<sup>2,3,4</sup>, Claudia Monaco<sup>1</sup>

<sup>1</sup>Kennedy Institute of Rheumatology, Nuffield Department of Orthopaedics, Rheumatology and Musculoskeletal Sciences, University of Oxford, Oxford, United Kingdom;

<sup>2</sup>Centre for Immunobiology, Institute of Infection, Immunity and Inflammation, College of Medical, Veterinary and Life Sciences, University of Glasgow, Glasgow, United Kingdom;

<sup>3</sup>Institute of Cardiovascular and Medical Sciences, College of Medical, Veterinary and Life Sciences, University of Glasgow, Glasgow, United Kingdom;

<sup>4</sup>Department of Pharmacy, University of Naples Federico II, Naples, Italy.

\* These authors contributed equally

**Corresponding author**

Professor Claudia Monaco

Kennedy Institute of Rheumatology

Roosevelt Drive

Headington

Oxford, OX3 7FY

United Kingdom

E-mail:claudia.monaco@kennedy.ox.ac.uk

Tel:+44 1865 612636

Fax:+44 1865 612601

Supplemental Table 1: List of antibody clones used in CyTOF analysis

| <b>Metal Label</b> | <b>Antigen</b>  | <b>Clone</b> | <b>Manufacturer</b> | <b>Conjugation</b> | <b>Figures used in for clustering</b> |
|--------------------|-----------------|--------------|---------------------|--------------------|---------------------------------------|
| 141Pr              | Ly-6G/C (Gr-1)  | RB6-8C5      | Fluidigm            | Fluidigm           | 1-3, 5                                |
| 142Nd              | CD11c           | N418         | Fluidigm            | Fluidigm           | 1-3, 5                                |
| 143Nd              | IL7Ra           | A7R34        | Biolegend           | In-house           | 1,2, S2, S3                           |
| 144Nd              | XCR1            | ZET          | Biolegend           | In-house           | 1-3, 5                                |
| 145Nd              | TCRgd           | GL3          | Biolegend           | In-house           | 1, 2, S2                              |
| 146Nd              | CX3CR1          | SA011F11     | Biolegend           | In-house           | 1-3, 5, S3                            |
| 147Sm              | CD45            | 30-F11       | Fluidigm            | Fluidigm           | None                                  |
| 148Nd              | CD11b (Mac-1)   | M1/70        | Fluidigm            | Fluidigm           | 1-3, 5                                |
| 149Sm              | CD19            | 6D5          | Fluidigm            | Fluidigm           | 1, 2                                  |
| 150Nd              | CD24            | M1/69        | Fluidigm            | Fluidigm           | 1-3, 5, S3                            |
| 151Eu              | CD64            | X54-5/7.1    | Fluidigm            | Fluidigm           | 1-3, 5                                |
| 152Sm              | CD3e            | 145-2C11     | Fluidigm            | Fluidigm           | 1, 2                                  |
| 153Eu              | CD335(NKp46)    | 29A1.4       | Fluidigm            | Fluidigm           | 1, 2                                  |
| 154Sm              | CD31 (PECAM-1)  | 390          | Abcam               | In-house           | None                                  |
| 155Gd              | ACTA 2          | 1A4          | Sigma               | In-house           | None                                  |
| 156Gd              | CD169           | 3D6.112      | Biolegend           | In-house           | 1-3, 5                                |
| 158Gd              | CD206           | C068C2       | Biolegend           | In-house           | 1-3, 5                                |
| 159Tb              | F4/80           | BM8          | Fluidigm            | Fluidigm           | 1-3, 5                                |
| 160Gd              | CD26            | DPP-4        | Biolegend           | In-house           | 1-3, 5, S2, S3                        |
| 161Dy              | CD103           | 2E7          | Biolegend           | In-house           | 1-3, 5, S2, S3                        |
| 162Dy              | Ly6C            | HK1.4        | Fluidigm            | Fluidigm           | 1-3, 5, S2, S3                        |
| 163Dy              | CCR2            | SA203G11     | Biolegend           | In-house           | 1-3, 5, S2, S3                        |
| 164Dy              | CD172a          | SIRPa        | Biolegend           | In-house           | 1-3, 5, S2, S3                        |
| 165Ho              | CD161 (NK1.1)   | PK136        | Fluidigm            | Fluidigm           | 1, 2, S2                              |
| 166Er              | CD209b (SIGNR1) | 2C7B27       | Biolegend           | In-house           | 1-3, 5                                |
| 167Er              | SIGLECF         | E50-2440     | BD                  | In-house           | 1-3, 5                                |
| 168Er              | CD8a            | 53-6.7       | Fluidigm            | Fluidigm           | 1, 2, S2                              |
| 169Tm              | TCRb            | H57-597      | Fluidigm            | Fluidigm           | 1, 2, S2                              |
| 170Er              | CD90.2          | 30-H12       | Biolegend           | In-house           | 1-3, 5                                |
| 171Yb              | CD44            | IM7          | Fluidigm            | Fluidigm           | 1-3, 5, S2, S3                        |
| 172Yb              | CD4             | RM4-5        | Fluidigm            | Fluidigm           | 1, 2, S2                              |
| 173Yb              | SIGLECH         | 551          | Biolegend           | In-house           | 1, 2                                  |
| 174Yb              | I-A/I-E (MHCII) | M5/114.15.2  | Fluidigm            | Fluidigm           | 3, 5                                  |
| 175Lu              | CD68            | FA-11        | Biolegend           | In-house           | 1-3, 5                                |
| 176Yb              | CD45R (B220)    | RA3-6B2      | Fluidigm            | Fluidigm           | 1, 2, S3                              |

Supplemental Table 2: Baseline composition of aortas from chow and high fat diet fed ApoE<sup>-/-</sup> mice

| Diet     | Live (% of cells)<br>mean $\pm$ SD | p (vs chow) | CD45+ (% of Live<br>cells) | p (vs chow) |
|----------|------------------------------------|-------------|----------------------------|-------------|
| Chow     | 85.6 $\pm$ 3.9                     | -           | 35.1 $\pm$ 5.0             | -           |
| High Fat | 87.2 $\pm$ 4.7                     | ns          | 38.4 $\pm$ 4.1             | ns          |

Supplemental Table 3: Percentage of Myeloid and T cells

| Diet     | Myeloid (% of<br>CD45+ cells)<br>mean $\pm$ SD | p (vs chow) | CD90.2+CD3+ (%<br>of CD45+ cells)<br>mean $\pm$ SD | p (vs chow) |
|----------|------------------------------------------------|-------------|----------------------------------------------------|-------------|
| Chow     | 75.58 $\pm$ 5.0                                | -           | 7.97 $\pm$ 2.35                                    | -           |
| High Fat | 76.35 $\pm$ 6.3                                | ns          | 8.49 $\pm$ 2.35                                    | ns          |

## Supplemental Figures and Legends

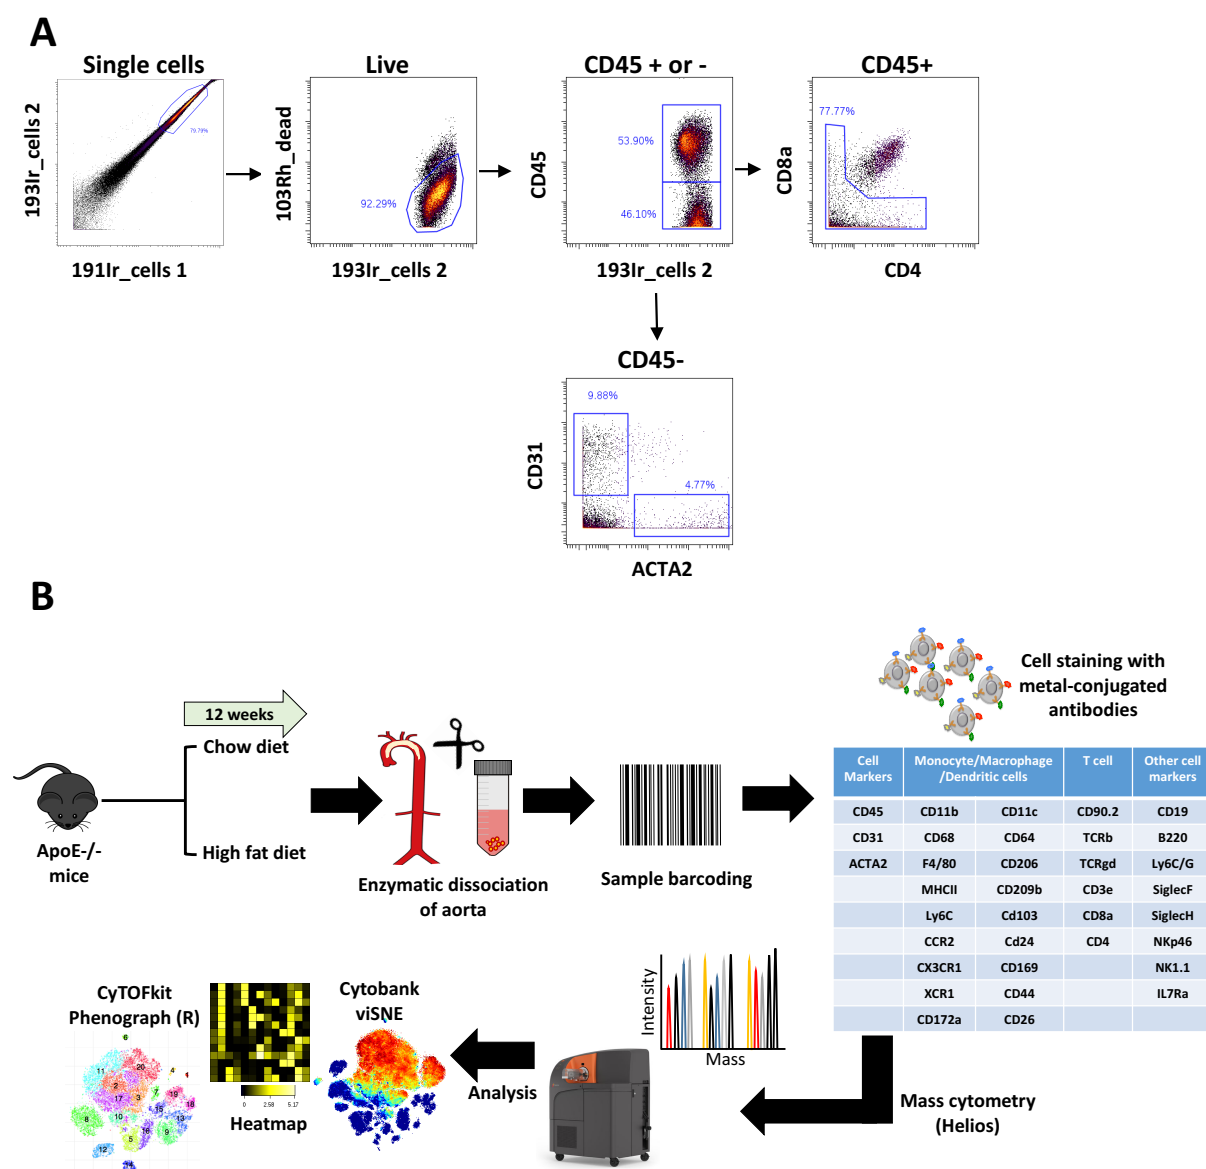

**Figure S1 Gating strategy for Live CD45<sup>+</sup> leucocytes and schematic illustration of experimental design.** **A.** Iridium DNA intercalator double positive events were gated as cells and normalisation beads were removed. Rhodium DNA intercalator negative cells were gated as live cells, which were then separated by the expression of CD45. CD45<sup>+</sup> cells were regarded as leucocytes and CD45<sup>-</sup> populations were further gated by CD31 and alpha smooth muscle cell actin 2 (ACTA2). CD45<sup>-</sup>CD31<sup>+</sup> and CD45<sup>-</sup>ACTA2<sup>+</sup> cells can be identified as endothelial cells and smooth muscle cells, respectively. To reduce thymic contamination, CD45<sup>+</sup>CD4<sup>+</sup>CD8<sup>+</sup> populations were removed from analyses. **B** Apolipoprotein E-deficient (ApoE<sup>-/-</sup>) mice were fed a chow or high fat diet at the age of 12-week for 12 weeks. Aortas were collected from the mice and single cells obtained by enzymatic digestion. Cells then underwent barcoding and staining using a panel of 35 cell markers (supplemental table 1). Data from the stained cells were acquired using Helios and were analysed using Cytobank (viSNE and heatmap) and CyTOFkit phenograph.

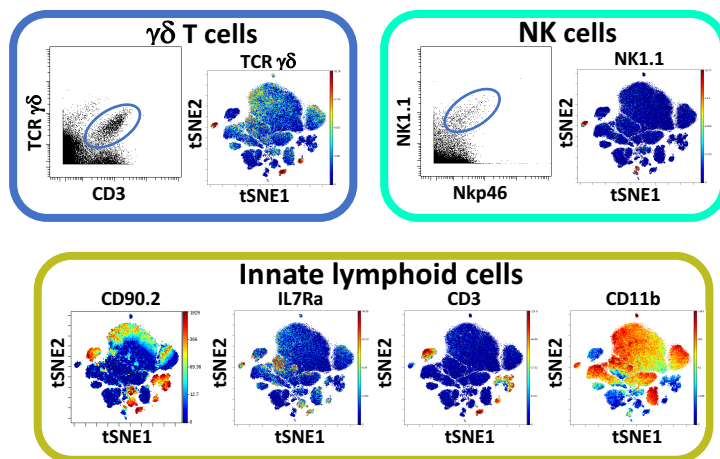

**Figure S2 Identification of leucocyte populations in aortas of ApoE<sup>-/-</sup> mice.** Single cell suspensions of aortas from Apolipoprotein E-deficient (ApoE<sup>-/-</sup>) mice fed either a chow or high fat diet were stained with a panel of 35 antibodies. For each sample, cells from 2 aortas were pooled. Live CD45<sup>+</sup> cells concatenated from the aortas of all apolipoprotein E-deficient (ApoE<sup>-/-</sup>) mice studied (both chow and high fat fed) (n=13) were clustered using viSNE on expression of 35 cell surface and intracellular markers outlined in supplemental table 1. The analysis identifies 15 populations including myeloid, lymphocyte and unknown subsets (Figure 1). The selected populations are displayed in a viSNE dot plot showing the expression level of their major markers with or without a representative dot plot showing two relevant cell population markers.

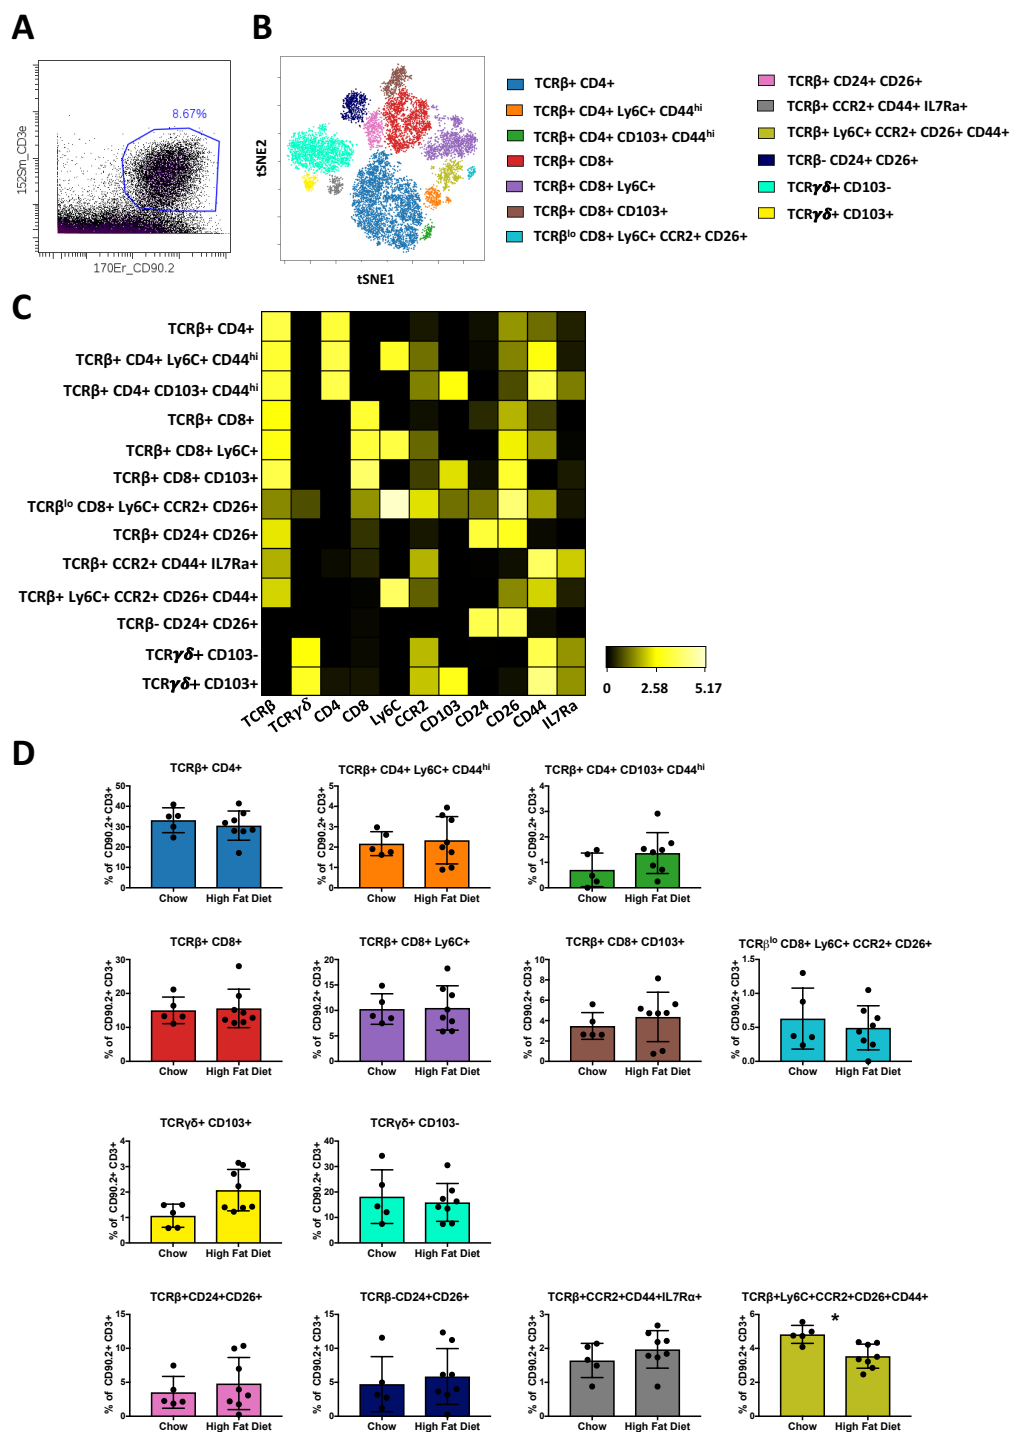

**Figure S3 viSNE analysis reveals multiple T lymphocyte subsets in murine atherosclerotic aortas. A.** Dot plot showing T cells gating ( $CD3e^+CD90.2^+$  from live  $Lin^-CD45^+$  leucocytes). **B.** T lymphocytes were clustered using viSNE on the expression of 12 cell surface and intracellular markers outlined in supplemental table 1. Identification of the 13 cell population clusters which included 3  $CD4^+$  T cells, 3  $CD8^+$  T cells, 2  $\gamma\delta$  T cells and 5 unknown populations. **C.** Heatmap showing the relative expression level of 11 cell markers within the 13 T cell subsets identified by the viSNE clustering shown in B. **D.** Bargraphs showing the changes in abundance of the cell populations identified in the viSNE clustering outlined in B, between chow and high fat diet fed mice. Data are presented as Mean  $\pm$  SD, Dots represent individual samples,  $n=5-8$  \* $P<0.05$

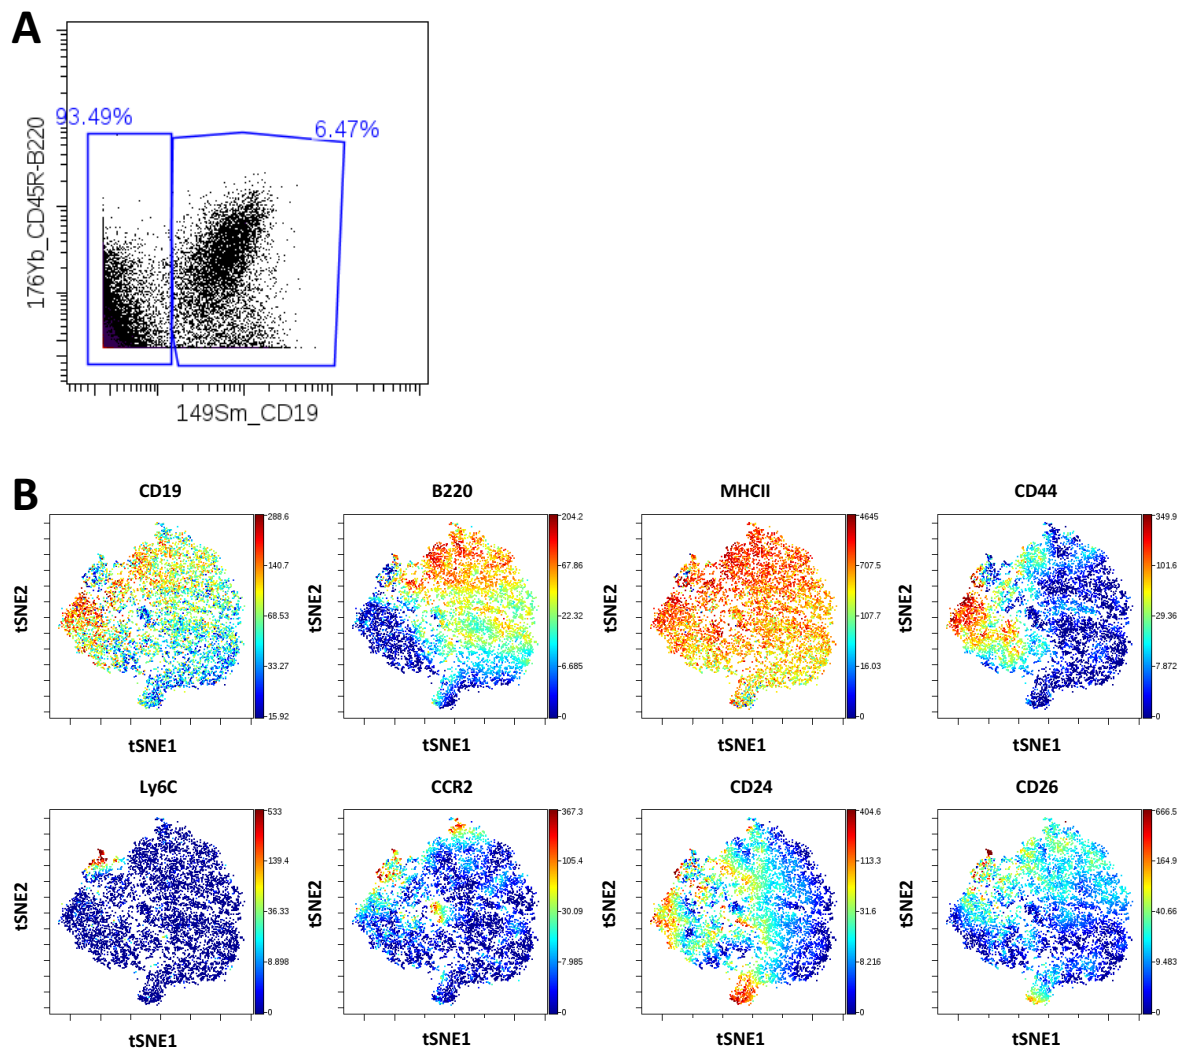

**Figure S4 B cells exhibit different expression profiles of key markers. A.** Dot plot showing B cells gating ( $CD19^+B220^{+/+}$  from live Lin-CD45+ leucocytes). **B.** B cells were clustered using viSNE on the expression of 10 cell surface and intracellular markers outlined in supplemental table 1. Expression levels of selected myeloid markers in the resulting viSNE clustered cell populations is shown.

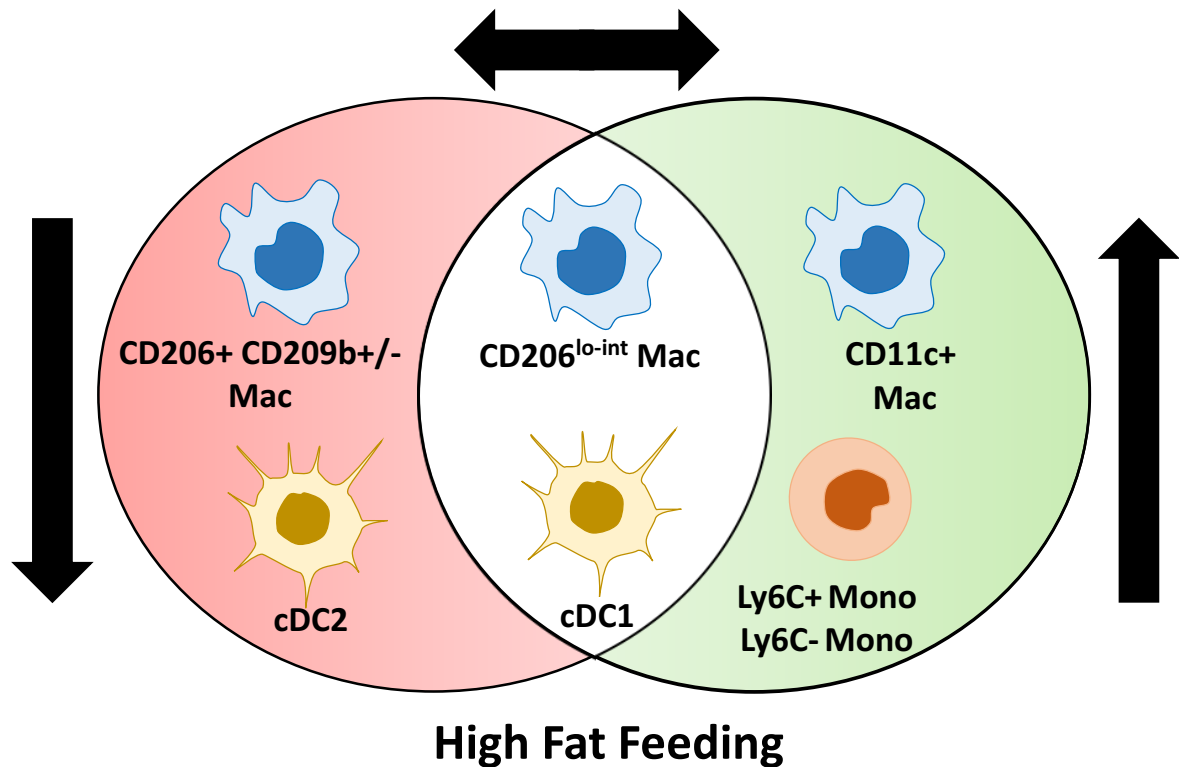

**Figure S5 Schematic diagram showing how myeloid cell populations in atherosclerotic aortas of ApoE<sup>-/-</sup> mice are affected by high fat feeding.** High fat feeding of ApoE<sup>-/-</sup> mice induces changes in the proportion of several myeloid cell subsets in the aorta as identified by viSNE analysis. Ly6C<sup>+</sup> and Ly6C<sup>-</sup> monocytes as well as CD11c<sup>+</sup> macrophages were increased in aortas of high fat fed mice (green circle) and conventional type 2 dendritic cells (cDC2) and CD206<sup>+</sup>CD169<sup>+</sup>CD209<sup>+/-</sup> macrophages were reduced (red circle). Proportions of conventional type 1 dendritic cells (cDC1), and CD206<sup>lo-int</sup> subsets were unchanged by high fat feeding.
